# Supplementary material for: Quantification of γδ T cells and HLA-DR+ NK cells does not predict emergence of new contrast enhancing lesions in MS patients suspending natalizumab treatment
Source: PLoS One. 2017 Jun 6;12(6):e0179095. doi: 10.1371/journal.pone.0179095 (PMC5460885; doi:10.1371/journal.pone.0179095)
Supplement: S1 File — (XLSX) [file pone.0179095.s001.xlsx]

## Sheet: Frequency of gd T cells
Patients initiating NTZ therapy									Patients suspending NTZ treatment
Patients ID	Baseline	+3 months	+6 months						Patients ID	Disease State	-6 months	-4 months	-2 months	at suspension	+3 months	+6 months
I1	3.32	1.99	1.27						S1	0	2.07	2.39	2.07	3.01	1.99	n/a
I2	3.82	2.57	3.66						S2	0	0.39	0.68	0.7	0.46	0.74	5.63
I3	0.55	0.47	0.46						S3	0	4.13	3.35	3.28	2.27	n/a	4.95
I4	2.29	2.01	2.28						S4	1	2.7	2.39	1.37	1.55	2.49	4.14
I5	2.42	2.05	2.37						S5	1	1.56	1.44	1.59	1.74	n/a	n/a
I6	0.82	1.12	1.21						S6	1	1.62	2.02	1.3	1.4	n/a	1.57
I7	0.79	1.22	1.63						S7	1	18.1	19.8	14.7	17.7	n/a	10.7
									S8	1	8.3	7.32	8.99	8.44	11	8.48
									S9	0	1.83	2.46	2.36	2.33	2.03	2.03
									S10	0	6.29	6.17	6.05	4.99	n/a	4.01
									S11	0	2.95	1.62	1.9	1.45	1.05	1.01
									S12	0	0.61	0.61	0.67	0.4	0.56	n/a
									S13	1	0.46	0.6	0.56	0.75	0.46	0.49
									S14	0	0.42	0.35	0.55	0.29	n/a	0.32
									S15	0	1.65	1.5	1.71	1.75	1.92	1.68
										0 - Patient was stable during observation period
										1 - Patient exhibited new gadolinium enhancing lesions

## Sheet: Absolute count of gd T cells
Patients initiating NTZ therapy									Patients suspending NTZ treatment
Patients ID	Baseline	+3 months	+6 months						Patients ID	Disease State	-6 months	-4 months	-2 months	at suspension	+3 months	+6 months
I1	22	31.6	24						S1	0	33.9273	39.5784	38.9574	50.7185	24.7357	n/a
I2	48.9	58.2	99.2						S2	0	6.8406	10.37	10.311	7.337	6.7118	57.3134
I3	6	9	10.3						S3	0	104.159	84.554	66.3216	29.6235	n/a	87.1695
I4	24.1	21.8	27.6						S4	1	59.697	61.3513	39.1957	42.3615	42.9525	40.2408
I5	41.9	72.6	77.3						S5	1	30.8724	24.2928	22.5621	28.9362	n/a	n/a
I6	5.8	15.1	17.4						S6	1	47.0772	41.208	29.497	31.794	n/a	31.871
I7	9.7	27	35.4						S7	1	473.134	388.08	318.696	383.028	n/a	157.076
									S8	1	248.253	224.797	269.88	278.182	360.03	176.808
									S9	0	50.7459	65.1408	61.6904	54.8016	33.4341	36.0528
									S10	0	203.733	178.066	166.859	149.001	n/a	84.4506
									S11	0	59.767	33.3072	25.213	25.578	15.078	11.6857
									S12	0	19.2394	16.5981	18.8404	10.968	8.8368	n/a
									S13	1	10.8744	17.94	12.992	20.9475	6.3066	6.5219
									S14	0	12.0246	11.9245	15.279	8.5782	n/a	5.1648
									S15	0	30.2445	26.235	37.0215	36.8025	29.9328	22.8984
										0 - Patient was stable during observation period
										1 - Patient exhibited new gadolinium enhancing lesions
