# Supplementary material for: Quantification of γδ T cells and HLA-DR+ NK cells does not predict emergence of new contrast enhancing lesions in MS patients suspending natalizumab treatment
Source: PLoS One. 2017 Jun 6;12(6):e0179095. doi: 10.1371/journal.pone.0179095 (PMC5460885; doi:10.1371/journal.pone.0179095)
Supplement: S2 File — (XLSX) [file pone.0179095.s002.xlsx]

## Sheet: Frequency of HLA-DR+ NK cells
Patients initiating NTZ therapy									Patients suspending NTZ treatment
Patients ID	Baseline	+3 months	+6 months						Patients ID	Disease State	-6 months	-4 months	-2 months	at suspension	+3 months	+6 months
I1	27.5	15.7	18.4						S1	0	10.2	5.21	14.7	8.54	6.3	n/a
I2	29.8	26.5	19.8						S2	0	54.8	52.5	58.1	48.7	45.6	45.3
I3	10.7	17.4	15						S3	0	11	35.6	16.3	19.2	n/a	24.9
I4	11.4	15.9	8.65						S4	1	10.8	8.55	10.5	11.6	12.9	14.1
I5	13.7	45.2	24.3						S5	1	29	24.1	28.9	27.1	n/a	n/a
I6	17.8	6.27	8.77						S6	1	7.67	11.3	8.36	5.35	n/a	5.73
I7	22.3	14.3	20.6						S7	1	6.21	4.67	8.61	6.96	n/a	6.35
									S8	1	6.22	6.91	6.92	4.58	5.56	9.05
									S9	0	21.7	30.1	24.2	27.2	27.4	26.3
									S10	0	15.9	12.4	13.3	9.5	n/a	7.13
									S11	0	17.7	17.1	11.5	19.7	7.76	12.6
									S12	0	4.65	3.57	4.76	2.85	3.06	n/a
									S13	1	18.8	11.9	15.5	18.7	15.1	9.72
									S14	0	18.8	23	19.6	12.2	n/a	19.1
									S15	0	5.96	8.89	7.39	6.33	7.41	6.56
										0 - Patient was stable during observation period
										1 - Patient exhibited new gadolinium enhancing lesions

## Sheet: Absolute count of HLA-DR+ NK ce
Patients initiating NTZ therapy									Patients suspending NTZ treatment
Patients ID	Baseline	+3 months	+6 months						Patients ID	Disease State	-6 months	-4 months	-2 months	at suspension	+3 months	+6 months
I1	25.3	35.6	39						S1	0	32.742	24.487	39.984	48.5926	16.506	n/a
I2	37	74.5	76.2						S2	0	111.792	106.575	91.798	125.159	72.048	42.129
I3	7.7	41.9	54						S3	0	19.03	51.264	19.886	14.4	n/a	21.165
I4	26.6	28.1	37.1						S4	1	61.02	33.687	43.89	60.088	48.504	39.903
I5	15.8	111.2	56.4						S5	1	60.61	54.225	67.626	44.715	n/a	n/a
I6	17.6	14.9	34.1						S6	1	25.3877	32.657	19.8132	16.799	n/a	12.3768
I7	46.8	71.6	90.2						S7	1	34.6518	18.3531	36.0759	28.3968	n/a	12.065
									S8	1	14.0572	13.82	13.4248	13.282	13.6776	9.955
									S9	0	36.456	72.541	47.432	47.056	40.552	36.557
									S10	0	144.69	103.292	125.153	86.64	n/a	19.8214
									S11	0	36.462	35.397	15.41	32.308	6.5184	11.088
									S12	0	29.109	25.6326	33.5104	11.7135	5.967	n/a
									S13	1	91.368	78.302	84.475	113.322	28.539	20.7036
									S14	0	66.74	86.02	64.484	19.886	n/a	40.301
									S15	0	33.4952	28.9814	33.9201	35.0049	30.8256	16.5968
										0 - Patient was stable during observation period
										1 - Patient exhibited new gadolinium enhancing lesions
				c
